# Supplementary material for: Weighting of risk factors for low birth weight: a linked routine data cohort study in Wales, UK
Source: HighWire-hosted journal article supplement (doi:10.1136/bmjopen-2022-063836), 2023-02-01
Supplement: bmjopen-2022-063836supp001_data_supplement.pdf [file bmjopen-2022-063836supp001_data_supplement.pdf]

**Supplementary Table1: Variables and their source datasets**

| Variables           | NCCHD                                                                                                               | Description                                                                                                                                                                                                                                                            |
|---------------------|---------------------------------------------------------------------------------------------------------------------|------------------------------------------------------------------------------------------------------------------------------------------------------------------------------------------------------------------------------------------------------------------------|
| WOB                 | Welsh Demographic Service (WDS) dataset                                                                             | Week of birth, the first Monday of the birth week                                                                                                                                                                                                                      |
| Gender              | National Community Child Health Database (NCCHD)                                                                    | Sex of the child                                                                                                                                                                                                                                                       |
| Maternal age        | NCCHD                                                                                                               | Maternal age at child's birth                                                                                                                                                                                                                                          |
| Gestational age     | NCCHD                                                                                                               | Gestational age in week (between 22 and 45 weeks)                                                                                                                                                                                                                      |
| Birth weight        | NCCHD                                                                                                               | Birth weight in gm (max 5000 gm)                                                                                                                                                                                                                                       |
| Birth order         | Derived                                                                                                             | It's based on the order of the child in the family using their week of birth and DENSE_RANK function. It ranks the children same if they are non-singleton children and sharing same WOB.                                                                              |
| Pregnancy interval  | Derived                                                                                                             | Pregnancy interval, in week format, was derived using the birth order, week of birth (the Monday of the week of date of birth), of the previous child and the current child, maternal identifier, and the multiple birth flag.                                         |
| Multiple birth flag | Derived                                                                                                             | Using WOB, encrypted maternal identifier and the birth order, a binary variable – 'multiple birth flag' was derived to distinguish between singleton and non-singleton birth.                                                                                          |
| Mother weight (kg)  | Derived                                                                                                             | The maternal weight during pregnancy was obtained from MID and WLGP. The final maternal weight variable was derived following cleaning and harmonising it with the source variables which includes removing and recoding missing, erroneous, and inconsistent records. |
| Maternal smoking    | NCCHD, Maternity Indicators Dataset (MIDS), Welsh Longitudinal General Practice Dataset (WLGP) - Welsh Primary Care | A cleaned and harmonised variable of maternal smoking during pregnancy was created based on the data obtained from three sources.                                                                                                                                      |
| WIMD                | WDS                                                                                                                 | Welsh Index of Multiple Deprivation (1: most deprived; 5: least deprived)                                                                                                                                                                                              |

|                            |                                          |                                                                                |
|----------------------------|------------------------------------------|--------------------------------------------------------------------------------|
| Diabetes (GP)              | WLGP                                     | Mothers' diabetes record from GP during pregnancy                              |
| Diabetes (Hospital)        | Patient Episode Dataset for Wales (PEDW) | Mothers' diabetes record from hospital during pregnancy                        |
| Depression (GP)            | WLGP                                     | Mothers' depression record from GP during pregnancy                            |
| Depression (Hospital)      | PEDW                                     | Mothers' depression record from hospital during pregnancy                      |
| Serious Mental Illness     | WLGP                                     | Mothers' serious mental illness related record from GP during pregnancy        |
| Anxiety (GP)               | WLGP                                     | Mothers' anxiety record from GP during pregnancy                               |
| Anxiety (Hospital)         | PEDW                                     | Mothers' anxiety record from hospital during pregnancy                         |
| Anti-depressant medication | WLGP                                     | Mothers' receiving anti-depressant medication from GP during pregnancy         |
| Vitamin D                  | WLGP                                     | Mothers' receiving Vitamin D from GP during pregnancy                          |
| FOLIC Acid                 | WLGP                                     | Mothers' receiving Folic acid from GP during pregnancy                         |
| Anaemia (GP)               | WLGP                                     | Mothers' Anaemia record from GP during pregnancy                               |
| Anaemia (Hospital)         | PEDW                                     | Mothers' Anaemia record from hospital during pregnancy                         |
| Alcohol (GP)               | WLGP                                     | Mothers' alcohol record from GP during pregnancy                               |
| Anaemia (Hospital)         | PEDW                                     | Mothers' alcohol record from hospital during pregnancy                         |
| Assault                    | PEDW                                     | Mother admitted to hospital during pregnancy for assault                       |
| Substance misuse           | Substance Misuse Dataset (SMDS)          | Mother receiving substance misuse treatment during pregnancy from SMD database |
| Living area                | WDS                                      | Living area during child's birth                                               |
| Local authority            | WDS                                      | Local authority of the living area                                             |

**Supplementary Table 2: Characteristics of the study population**

| Variables                       | Overall training set<br>(n = 639,163) |        | Overall test set<br>(n = 54,214) |        | Overall<br>(n = 693,377) |        |
|---------------------------------|---------------------------------------|--------|----------------------------------|--------|--------------------------|--------|
| Gender                          |                                       |        |                                  |        |                          |        |
| Girl                            | 311,193                               | 48.69% | 26,689                           | 49.23% | 337,882                  | 48.73% |
| Boy                             | 327,920                               | 51.30% | 27,522                           | 50.77% | 355,442                  | 51.26% |
| Unknown/NULL                    | 50                                    | 0.01%  | <5                               | -      | -                        | -      |
| Maternal age                    |                                       |        |                                  |        |                          |        |
| Less than 19                    | 46,668                                | 7.30%  | 5,156                            | 9.51%  | 51,824                   | 7.47%  |
| 20-24                           | 133,792                               | 20.93% | 13,149                           | 24.25% | 146,941                  | 21.19% |
| 25-29                           | 181,233                               | 28.35% | 16,454                           | 30.35% | 197,687                  | 28.51% |
| 30-34                           | 170,957                               | 26.75% | 12,938                           | 23.86% | 183,895                  | 26.52% |
| 35 and above                    | 105,869                               | 16.56% | 6,513                            | 12.01% | 112,382                  | 16.21% |
| Unknown/NULL                    | 644                                   | 0.10%  | <5                               | -      | -                        | -      |
| Birth order                     |                                       |        |                                  |        |                          |        |
| 1 <sup>st</sup> child           | 319,093                               | 49.92% | 26,552                           | 48.98% | 345,645                  | 49.85% |
| 2 <sup>nd</sup> child           | 212,155                               | 33.19% | 18,672                           | 34.44% | 230,827                  | 33.29% |
| 3 <sup>rd</sup> child           | 74,724                                | 11.69% | 6,407                            | 11.82% | 81,131                   | 11.70% |
| 4 <sup>th</sup> or above        | 33,191                                | 5.19%  | 2,583                            | 4.76%  | 35,774                   | 5.16%  |
| Pregnancy interval              |                                       |        |                                  |        |                          |        |
| Only/First child                | 319,093                               | 49.92% | 26,552                           | 48.98% | 345,645                  | 49.85% |
| less than 1 year                | 5,708                                 | 0.89%  | 526                              | 0.97%  | 6,234                    | 0.90%  |
| 1-2 years                       | 67,986                                | 10.64% | 5,333                            | 9.84%  | 73,319                   | 10.57% |
| 2-5 years                       | 162,590                               | 25.44% | 13,519                           | 24.94% | 176,109                  | 25.40% |
| 5-7 years                       | 41,060                                | 6.42%  | 4,081                            | 7.53%  | 45,141                   | 6.51%  |
| 7-10 years                      | 27,161                                | 4.25%  | 2,707                            | 4.99%  | 29,868                   | 4.31%  |
| Above 10 years                  | 15,565                                | 2.44%  | 1,496                            | 2.76%  | 17,061                   | 2.46%  |
| Gestational age (week)          |                                       |        |                                  |        |                          |        |
| 1: Extremely pre-term: <28 week | 2,361                                 | 0.37%  | 208                              | 0.38%  | 2,569                    | 0.37%  |
| 2: Very pre-term: 28-31         | 5,296                                 | 0.83%  | 565                              | 1.04%  | 5,861                    | 0.85%  |
| 3: Pre-term: 32-36              | 38,565                                | 6.03%  | 3,664                            | 6.76%  | 42,229                   | 6.09%  |
| 4: term: 37-42                  | 577,104                               | 90.29% | 49,540                           | 91.38% | 626,644                  | 90.38% |
| 5: Late term: 43-45             | 3,909                                 | 0.61%  | 91                               | 0.17%  | 4,000                    | 0.58%  |
| Unknown/NULL                    | 11,928                                | 1.87%  | 146                              | 0.27%  | 12,074                   | 1.74%  |
| Birth weight (gm)               |                                       |        |                                  |        |                          |        |
| 1: BW ≤ 1,000                   | 3,010                                 | 0.47%  | 246                              | 0.45%  | 3,256                    | 0.47%  |
| 2: BW 1,001 - 1,500             | 4,372                                 | 0.68%  | 445                              | 0.82%  | 4,817                    | 0.69%  |
| 3: BW 1,501 - 2,499             | 39,143                                | 6.12%  | 3,923                            | 7.24%  | 43,066                   | 6.21%  |
| 4: BW 2,500 - 4,000             | 521,172                               | 81.54% | 44,524                           | 82.13% | 565,696                  | 81.59% |
| 5: BW 4,001 - 4,500             | 61,658                                | 9.65%  | 4,413                            | 8.14%  | 66,071                   | 9.53%  |
| 6: BW 4,501 - 5000              | 9,808                                 | 1.53%  | 663                              | 1.22%  | 10,471                   | 1.51%  |
| Low Birth Weight (LBW)          |                                       |        |                                  |        |                          |        |
| nLBW                            | 594,408                               | 93.00% | 49,734                           | 91.74% | 644,142                  | 92.90% |
| LBW                             | 44,755                                | 7.00%  | 4,480                            | 8.26%  | 49,235                   | 7.10%  |

|                                     |         |        |        |        |         |        |
|-------------------------------------|---------|--------|--------|--------|---------|--------|
| Multiple birth flag                 |         |        |        |        |         |        |
| Singleton                           | 619,458 | 96.92% | 52,583 | 96.99% | 672,041 | 96.92% |
| Non-singleton                       | 19,705  | 3.08%  | 1,631  | 3.01%  | 21,336  | 3.08%  |
| Maternal smoking                    |         |        |        |        |         |        |
| No                                  | 502,914 | 78.68% | 41,344 | 76.26% | 544,258 | 78.49% |
| Yes                                 | 136,249 | 21.32% | 12,870 | 23.74% | 149,119 | 21.51% |
| Welsh Index of Multiple Deprivation |         |        |        |        |         |        |
| 1 (most deprived)                   | 147,204 | 23.03% | 17,946 | 33.10% | 165,150 | 23.82% |
| 2                                   | 118,271 | 18.50% | 17,711 | 32.67% | 135,982 | 19.61% |
| 3                                   | 117,242 | 18.34% | 7,089  | 13.08% | 124,331 | 17.93% |
| 4                                   | 104,056 | 16.28% | 3,646  | 6.73%  | 107,702 | 15.53% |
| 5 (least deprived)                  | 94,190  | 14.74% | 6,242  | 11.51% | 100,432 | 14.48% |
| Unknown/NULL                        | 58,200  | 9.11%  | 1,580  | 2.91%  | 59,780  | 8.62%  |
| Diabetes GP (mother)                |         |        |        |        |         |        |
| No                                  | 638,628 | 99.92% | 54,149 | 99.88% | 692,777 | 99.91% |
| Yes                                 | 535     | 0.08%  | 65     | 0.12%  | 600     | 0.09%  |
| Diabetes PEDW (mother)              |         |        |        |        |         |        |
| No                                  | 636,104 | 99.52% | 53,978 | 99.56% | 690,082 | 99.52% |
| Yes                                 | 3,059   | 0.48%  | 236    | 0.44%  | 3,295   | 0.48%  |
| Depression GP (mother)              |         |        |        |        |         |        |
| No                                  | 631,230 | 98.76% | 53,323 | 98.36% | 684,553 | 98.73% |
| Yes                                 | 7,933   | 1.24%  | 891    | 1.64%  | 8,824   | 1.27%  |
| Depression PEDW (mother)            |         |        |        |        |         |        |
| No                                  | 634,990 | 99.35% | 53,950 | 99.51% | 688,940 | 99.36% |
| Yes                                 | 4,173   | 0.65%  | 264    | 0.49%  | 4,437   | 0.64%  |
| Serious Mental Illness (mother)     |         |        |        |        |         |        |
| No                                  | 638,887 | 99.96% | 54,185 | 99.95% | 693,072 | 99.96% |
| Yes                                 | 276     | 0.04%  | 29     | 0.05%  | 305     | 0.04%  |
| Anxiety GP (mother)                 |         |        |        |        |         |        |
| No                                  | 629,681 | 98.52% | 53,131 | 98.00% | 682,812 | 98.48% |
| Yes                                 | 9,482   | 1.48%  | 1,083  | 2.00%  | 10,565  | 1.52%  |
| Anxiety PEDW (mother)               |         |        |        |        |         |        |
| No                                  | 635,910 | 99.49% | 53,967 | 99.54% | 689,877 | 99.50% |
| Yes                                 | 3,253   | 0.51%  | 247    | 0.46%  | 3,500   | 0.50%  |
| Anti-depressant medication (mother) |         |        |        |        |         |        |
| No                                  | 639,019 | 99.98% | 54,194 | 99.96% | 693,213 | 99.98% |
| Yes                                 | 144     | 0.02%  | 20     | 0.04%  | 164     | 0.02%  |
| Vitamin D (mother)                  |         |        |        |        |         |        |
| No                                  | 637,171 | 99.69% | 54,170 | 99.92% | 691,341 | 99.71% |
| Yes                                 | 1,992   | 0.31%  | 44     | 0.08%  | 2,036   | 0.29%  |
| FOLIC Acid (mother)                 |         |        |        |        |         |        |
| No                                  | 486,360 | 76.09% | 37,663 | 69.47% | 524,023 | 75.58% |
| Yes                                 | 152,803 | 23.91% | 16,551 | 30.53% | 169,354 | 24.42% |

|                                                    |         |        |        |        |         |        |
|----------------------------------------------------|---------|--------|--------|--------|---------|--------|
| Anaemia GP (mother)                                |         |        |        |        |         |        |
| No                                                 | 621,276 | 97.20% | 52,636 | 97.09% | 673,912 | 97.19% |
| Yes                                                | 17,887  | 2.80%  | 1,578  | 2.91%  | 19,465  | 2.81%  |
| Anaemia PEDW (mother)                              |         |        |        |        |         |        |
| No                                                 | 631,370 | 98.78% | 53,883 | 99.39% | 685,253 | 98.83% |
| Yes                                                | 7,793   | 1.22%  | 331    | 0.61%  | 8,124   | 1.17%  |
| Alcohol - GP (mother)                              |         |        |        |        |         |        |
| No                                                 | 601,660 | 94.13% | 50,836 | 93.77% | 652,496 | 94.10% |
| Yes                                                | 37,503  | 5.87%  | 3,378  | 6.23%  | 40,881  | 5.90%  |
| Alcohol - PEDW (mother)                            |         |        |        |        |         |        |
| No                                                 | 638532  | 99.90% | 54177  | 99.93% | 692,709 | 99.90% |
| Yes                                                | 631     | 0.10%  | 37     | 0.07%  | 668     | 0.10%  |
| Assault - PEDW (mother)                            |         |        |        |        |         |        |
| No                                                 | 638,479 | 99.89% | 54165  | 99.91% | 692,644 | 99.89% |
| Yes                                                | 684     | 0.11%  | 49     | 0.09%  | 733     | 0.11%  |
| Substance misuse – any (mother)                    |         |        |        |        |         |        |
| No                                                 | 607,433 | 95.04% | 51,087 | 94.23% | 658,520 | 94.97% |
| Yes                                                | 31,730  | 4.96%  | 3,127  | 5.77%  | 34,857  | 5.03%  |
| Substance misuse - alcohol (mother)                |         |        |        |        |         |        |
| No                                                 | 631,148 | 98.75% | 53,235 | 98.19% | 684,383 | 98.70% |
| Yes                                                | 7,767   | 1.22%  | 975    | 1.80%  | 8,742   | 1.26%  |
| Unknown/NULL                                       | 248     | 0.04%  | <5     | -      | -       | -      |
| Substance misuse - other (mother)                  |         |        |        |        |         |        |
| No                                                 | 632,443 | 98.95% | 53,381 | 98.46% | 685,824 | 98.91% |
| Yes                                                | 6,199   | 0.97%  | 794    | 1.46%  | 6,993   | 1.01%  |
| Unknown/NULL                                       | 521     | 0.08%  | 39     | 0.07%  | 560     | 0.08%  |
| Mother weight (kg)                                 |         |        |        |        |         |        |
| Average (before imputation)                        | 71      |        | 72.39  |        | 71.06   |        |
| Median (before imputation)                         |         |        |        |        | 67.58   |        |
| Average (after imputation)                         |         |        |        |        | 70.82   |        |
| Median (after imputation)                          |         |        |        |        | 67.00   |        |
| Living area                                        |         |        |        |        |         |        |
| Town and Fringe - Less Sparse                      | 82,435  | 12.90% | 12,702 | 23.43% | 95,137  | 13.72% |
| Town and Fringe - Sparse                           | 22,106  | 3.46%  | 71     | 0.13%  | 22,177  | 3.20%  |
| Urban > 10K - Less Sparse                          | 403,591 | 63.14% | 37,924 | 69.95% | 441,515 | 63.68% |
| Urban > 10K - Sparse                               | 13,441  | 2.10%  | 37     | 0.07%  | 13,478  | 1.94%  |
| Village, Hamlet & Isolated Dwellings - Less Sparse | 46,166  | 7.22%  | 1,464  | 2.70%  | 47,630  | 6.87%  |
| Village, Hamlet & Isolated Dwellings - Sparse      | 48,314  | 7.56%  | 169    | 0.31%  | 48,483  | 6.99%  |
| Unknown/NULL                                       | 23,110  | 3.62%  | 1,847  | 3.41%  | 24,957  | 3.60%  |
| Local authority                                    |         |        |        |        |         |        |
| Blaenau Gwent                                      |         |        |        |        | 15,008  | 2.16%  |
| Bridgend                                           |         |        |        |        | 28,018  | 4.04%  |
| Caerphilly                                         |         |        |        |        | 40,418  | 5.83%  |

|                    |  |  |  |  |        |        |
|--------------------|--|--|--|--|--------|--------|
| Cardiff            |  |  |  |  | 80,247 | 11.57% |
| Carmarthenshire    |  |  |  |  | 34,705 | 5.01%  |
| Ceredigion         |  |  |  |  | 11,090 | 1.60%  |
| Conwy              |  |  |  |  | 20,389 | 2.94%  |
| Denbighshire       |  |  |  |  | 19,697 | 2.84%  |
| Flintshire         |  |  |  |  | 32,471 | 4.68%  |
| Gwynedd            |  |  |  |  | 23,249 | 3.35%  |
| Isle of Anglesey   |  |  |  |  | 13,941 | 2.01%  |
| Merthyr Tydfil     |  |  |  |  | 13,259 | 1.91%  |
| Monmouthshire      |  |  |  |  | 14,899 | 2.15%  |
| Neath Port Talbot  |  |  |  |  | 28,854 | 4.16%  |
| Newport            |  |  |  |  | 35,153 | 5.07%  |
| Pembrokeshire      |  |  |  |  | 23,929 | 3.45%  |
| Powys              |  |  |  |  | 20,546 | 2.96%  |
| Rhondda Cynon Taff |  |  |  |  | 54,214 | 7.82%  |
| Swansea            |  |  |  |  | 49,588 | 7.15%  |
| Torfaen            |  |  |  |  | 20,500 | 2.96%  |
| Vale of Glamorgan  |  |  |  |  | 25,657 | 3.70%  |
| Wrexham            |  |  |  |  | 29,346 | 4.23%  |
| Unknown/NULL       |  |  |  |  | 58,199 | 8.39%  |

**Supplementary Table 3: Multivariable logistic regression model to identify the risk factors of LBW among the overall study population.**

| Variable name in model (description)                              | OR    | Lower CI | Upper CI |
|-------------------------------------------------------------------|-------|----------|----------|
| GENDER (Gender)                                                   |       |          |          |
| Boy                                                               | 1     |          |          |
| Girl                                                              | 1.16  | 1.14     | 1.18     |
| MOMSMOKE (Maternal smoking)                                       |       |          |          |
| No                                                                | 1     |          |          |
| Yes                                                               | 1.80  | 1.76     | 1.84     |
| MOMAGE (Maternal age)                                             |       |          |          |
| Less than 19                                                      | 0.94  | 0.90     | 0.97     |
| 20-24                                                             | 1.00  | 0.97     | 1.03     |
| 25-29                                                             | 1     |          |          |
| 30-34                                                             | 1.05  | 1.02     | 1.09     |
| 35 and above                                                      | 1.24  | 1.20     | 1.29     |
| BIRTHORDER (Birth order)                                          |       |          |          |
| 1 <sup>st</sup> child                                             | 1     |          |          |
| 2 <sup>nd</sup> child                                             | 0.59  | 0.57     | 0.60     |
| 3 <sup>rd</sup> child                                             | 0.65  | 0.62     | 0.67     |
| 4 <sup>th</sup> or above                                          | 0.84  | 0.80     | 0.88     |
| PREGNANCY_INTERVAL (Pregnancy interval)                           |       |          |          |
| Less than 1 year                                                  | 2.92  | 2.70     | 3.15     |
| 1-2 years                                                         | 1.13  | 1.09     | 1.18     |
| 2-5 years                                                         | 1     |          |          |
| 5-7 years                                                         | 1.15  | 1.10     | 1.21     |
| 7-10 years                                                        | 1.30  | 1.24     | 1.37     |
| Above 10 years                                                    | 1.60  | 1.51     | 1.70     |
| MULTIPLE_BIRTH (Multiple birth flag)                              |       |          |          |
| Singleton                                                         |       |          |          |
| Non-singleton                                                     | 21.74 | 21.09    | 22.40    |
| WIMD (Welsh Index of Multiple Deprivation)                        |       |          |          |
| 1 (most deprived)                                                 | 1     |          |          |
| 2                                                                 | 0.91  | 0.88     | 0.94     |
| 3                                                                 | 0.84  | 0.82     | 0.87     |
| 4                                                                 | 0.78  | 0.75     | 0.81     |
| 5 (least deprived)                                                | 0.70  | 0.67     | 0.72     |
| WIMDENV (Welsh Index of Multiple Deprivation – Environment score) |       |          |          |
| 1 (most deprived)                                                 | 1     |          |          |
| 2                                                                 | 0.99  | 0.96     | 1.02     |
| 3                                                                 | 1.01  | 0.98     | 1.04     |
| 4                                                                 | 1.02  | 0.99     | 1.06     |
| 5 (least deprived)                                                | 1.00  | 0.96     | 1.03     |
| LA (Local authority)                                              |       |          |          |
| Blaenau Gwent                                                     | 1.23  | 1.15     | 1.32     |

|                                                               |      |      |      |
|---------------------------------------------------------------|------|------|------|
| Bridgend                                                      | 1.01 | 0.95 | 1.07 |
| Caerphilly                                                    | 1.06 | 1.00 | 1.11 |
| Cardiff                                                       | 1    |      |      |
| Carmarthenshire                                               | 1.02 | 0.96 | 1.08 |
| Ceredigion                                                    | 0.91 | 0.83 | 1.01 |
| Conwy                                                         | 1.05 | 0.98 | 1.12 |
| Denbighshire                                                  | 1.13 | 1.06 | 1.21 |
| Flintshire                                                    | 1.08 | 1.02 | 1.14 |
| Gwynedd                                                       | 1.04 | 0.97 | 1.12 |
| Isle of Anglesey                                              | 1.11 | 1.02 | 1.20 |
| Merthyr Tydfil                                                | 1.13 | 1.05 | 1.22 |
| Monmouthshire                                                 | 1.02 | 0.94 | 1.10 |
| Neath Port Talbot                                             | 0.94 | 0.89 | 1.00 |
| Newport                                                       | 1.13 | 1.08 | 1.19 |
| Pembrokeshire                                                 | 1.04 | 0.97 | 1.11 |
| Powys                                                         | 1.01 | 0.93 | 1.09 |
| Rhondda Cynon Taff                                            | 1.23 | 1.17 | 1.28 |
| Swansea                                                       | 0.97 | 0.93 | 1.02 |
| Torfaen                                                       | 1.09 | 1.02 | 1.16 |
| Vale of Glamorgan                                             | 0.98 | 0.92 | 1.04 |
| Wrexham                                                       | 1.20 | 1.14 | 1.27 |
| MOM_DIAB_GP (Diabetes GP (mother))                            |      |      |      |
| No                                                            | 1    |      |      |
| Yes                                                           | 2.03 | 1.81 | 2.28 |
| MOM_DIAB_PEDW (Diabetes PEDW (mother))                        |      |      |      |
| No                                                            | 1    |      |      |
| Yes                                                           | 1.32 | 1.01 | 1.74 |
| MOM_DEPRE_GP (Depression GP (mother))                         |      |      |      |
| No                                                            | 1    |      |      |
| Yes                                                           | 1.24 | 1.14 | 1.34 |
| MOM_DEPRE_PEDW (Depression PEDW (mother))                     |      |      |      |
| No                                                            | 1    |      |      |
| Yes                                                           | 1.58 | 1.43 | 1.75 |
| MOM_SeriousMentalIllness_GP (Serious Mental Illness (mother)) |      |      |      |
| No                                                            | 1    |      |      |
| Yes                                                           | 1.46 | 1.04 | 2.05 |
| MOM_VITD_GP (Vitamin D (mother))                              |      |      |      |
| No                                                            | 1    |      |      |
| Yes                                                           | 1.15 | 0.96 | 1.38 |
| MOM_FOLIC_GP                                                  |      |      |      |
| No                                                            | 1    |      |      |
| Yes                                                           | 1.09 | 1.06 | 1.11 |
| MOM_ALCO_GP (Alcohol - GP (mother))                           |      |      |      |
| No                                                            | 1    |      |      |



|                                                                   |      |      |      |
|-------------------------------------------------------------------|------|------|------|
| Yes                                                               | 1.02 | 0.98 | 1.06 |
| MOM_ALCO_PEDW (Alcohol -PEDW (mother))                            |      |      |      |
| No                                                                | 1    |      |      |
| Yes                                                               | 1.60 | 1.30 | 1.97 |
| MOM_ANXIETY_GP (Anxiety GP (mother))                              |      |      |      |
| No                                                                | 1    |      |      |
| Yes                                                               | 1.10 | 1.02 | 1.19 |
| MOM_ANXIETY_PEDW (Anxiety PEDW (mother))                          |      |      |      |
| No                                                                |      |      |      |
| Yes                                                               | 1.22 | 1.08 | 1.38 |
| MOM_ANTIDEP_MED (Anti-depressant medication (mother))             |      |      |      |
| No                                                                | 1    |      |      |
| Yes                                                               | 1.92 | 1.20 | 3.07 |
| MOM_ANAEMIA_GP (Anaemia GP (mother))                              |      |      |      |
| No                                                                | 1    |      |      |
| Yes                                                               | 0.70 | 0.65 | 0.74 |
| MOM_ANAEMIA_PEDW (Anaemia PEDW (mother))                          |      |      |      |
| No                                                                | 1    |      |      |
| Yes                                                               | 1.26 | 1.16 | 1.36 |
| MOM_ASSAULT (Assault - PEDW (mother))                             |      |      |      |
| No                                                                | 1    |      |      |
| Yes                                                               | 1.16 | 0.91 | 1.47 |
| MOM_SubstanceMisuse_Any (Substance misuse – any (mother))         |      |      |      |
| No                                                                | 1    |      |      |
| Yes                                                               | 1.35 | 1.29 | 1.41 |
| MOM_SubstanceMisuse_Alcohol (Substance misuse - alcohol (mother)) |      |      |      |
| No                                                                | 1    |      |      |
| Yes                                                               | 1.27 | 1.17 | 1.38 |
| MOM_SubstanceMisuse_Otherdrug (Substance misuse - other (mother)) |      |      |      |
| No                                                                | 1    |      |      |
| Yes                                                               | 1.14 | 1.04 | 1.24 |
| MOMWEIGHT (Mother weight)                                         |      |      |      |
|                                                                   | 0.99 | 0.99 | 0.99 |
| LIVINGAREA (Living area)                                          |      |      |      |
| Town and Fringe - Less Sparse                                     | 1.02 | 0.95 | 1.09 |
| Town and Fringe - Sparse                                          | 1.03 | 0.96 | 1.12 |
| Urban > 10K - Less Sparse                                         | 1    |      |      |
| Urban - Sparse                                                    | 1.02 | 0.99 | 1.05 |
| Village, Hamlet & Isolated Dwellings - Less Sparse                | 0.95 | 0.91 | 0.99 |
| Village, Hamlet & Isolated Dwellings - Sparse                     | 0.89 | 0.85 | 0.94 |

Supplementary Table 4: Distribution of LBW and nLBW children based on their multiple birth flags

|               | Overall training set<br>(n = 639,163) |        | Overall test set<br>(n = 54,214) |        | Total<br>(n = 693,377) |        |
|---------------|---------------------------------------|--------|----------------------------------|--------|------------------------|--------|
| Singleton     |                                       |        |                                  |        |                        |        |
| nLBW          | 585,163                               | 94.46% | 49,145                           | 93.46% | 634,308                | 94.39% |
| LBW           | 34,295                                | 5.54%  | 3,438                            | 6.54%  | 37,733                 | 5.61%  |
| Non-singleton |                                       |        |                                  |        |                        |        |
| nLBW          | 9,245                                 | 46.92% | 589                              | 36.11% | 9,834                  | 46.09% |
| LBW           | 10,460                                | 53.08% | 1,042                            | 63.89% | 11,502                 | 53.91% |
