# Supplementary material for: Weighting of risk factors for low birth weight: a linked routine data cohort study in Wales, UK
Source: HighWire-hosted journal article supplement (doi:10.1136/bmjopen-2022-063836), 2023-02-01
Supplement: bmjopen-2022-063836supp002_data_supplement.pdf [file bmjopen-2022-063836supp002_data_supplement.pdf]

**Supplementary Figure 1: Significant risk factors associated with the risk LBW after linking with PPN record**

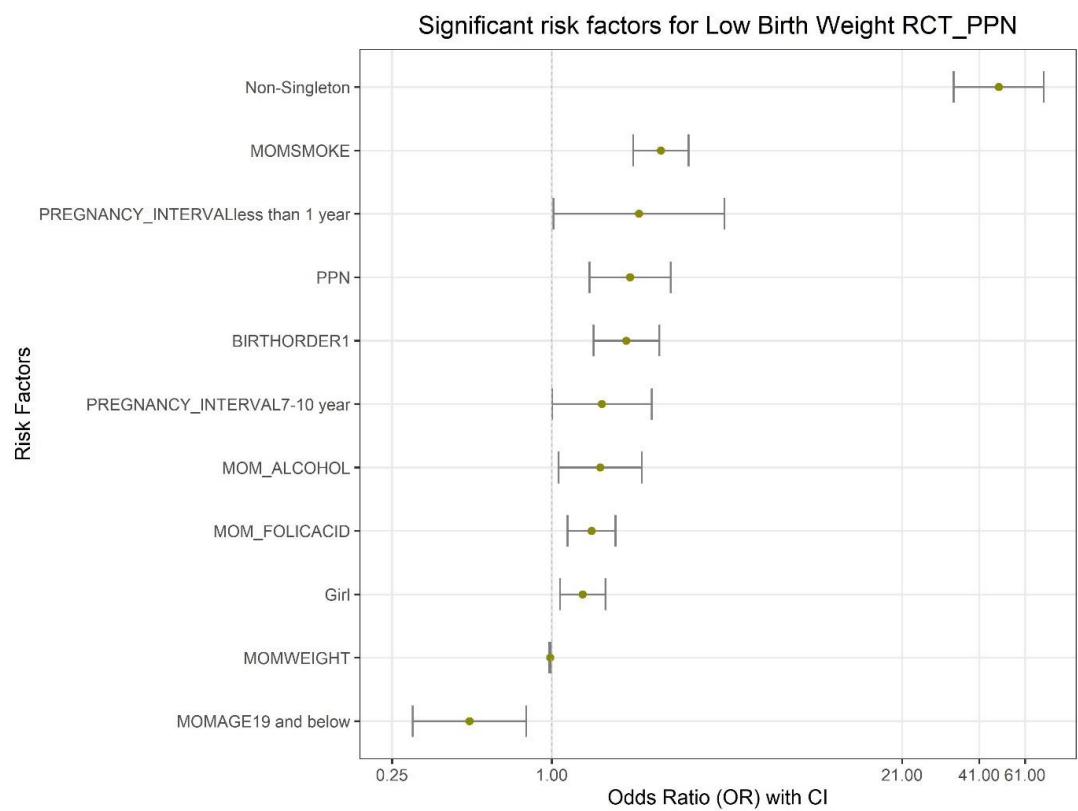

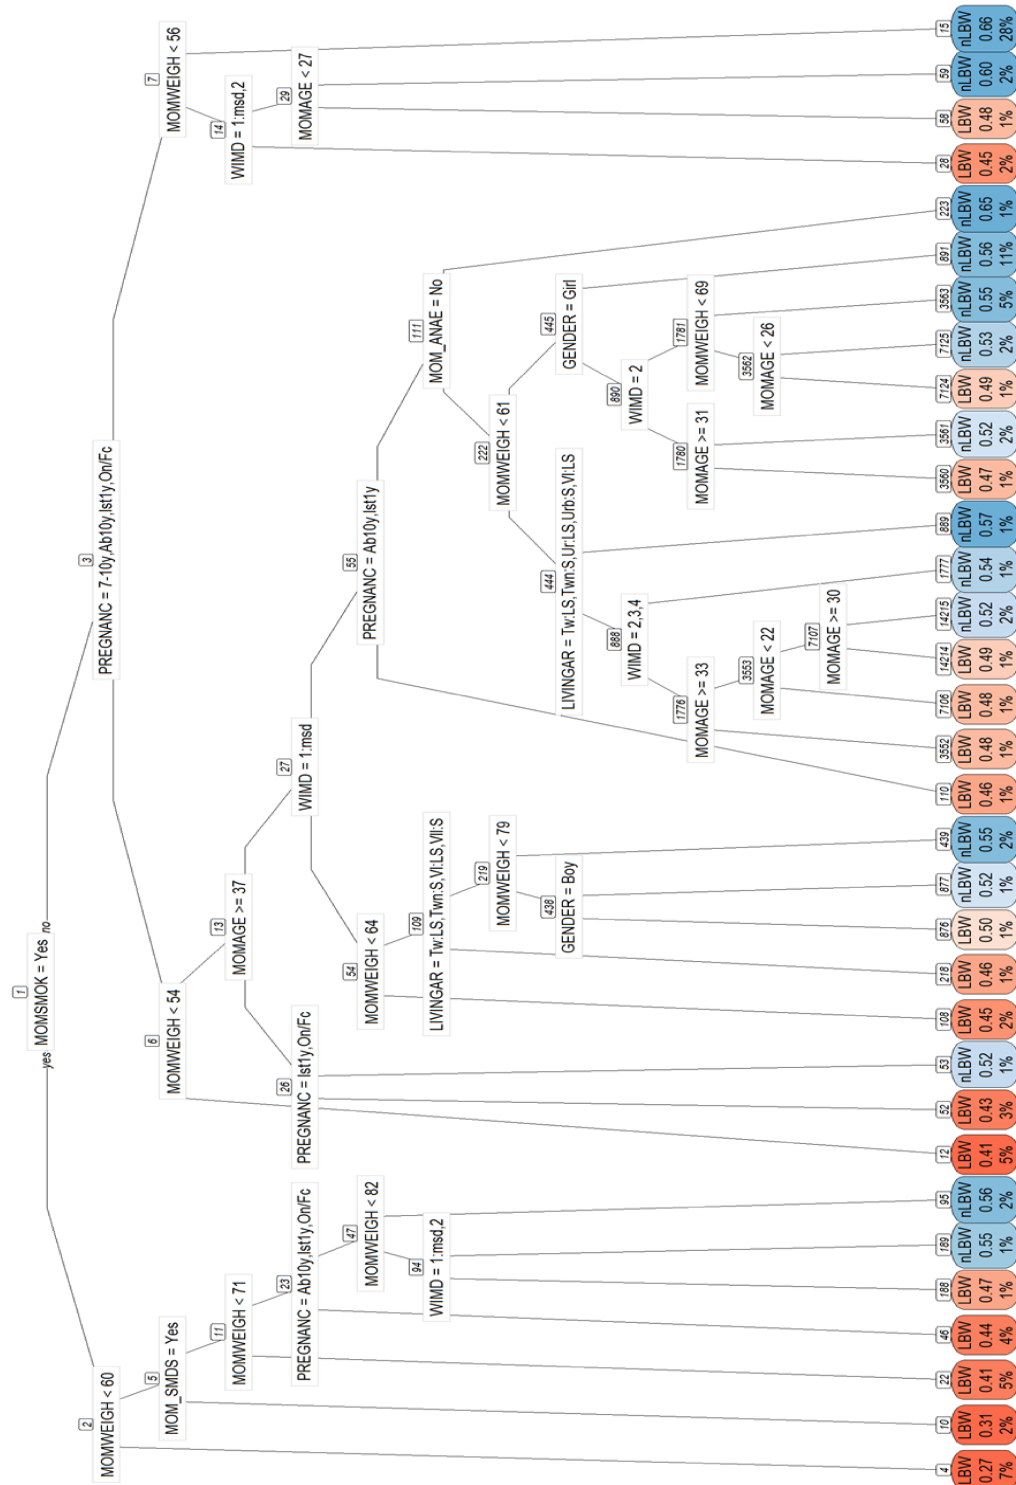

**Supplementary Figure 2: Decision tree for singleton children**

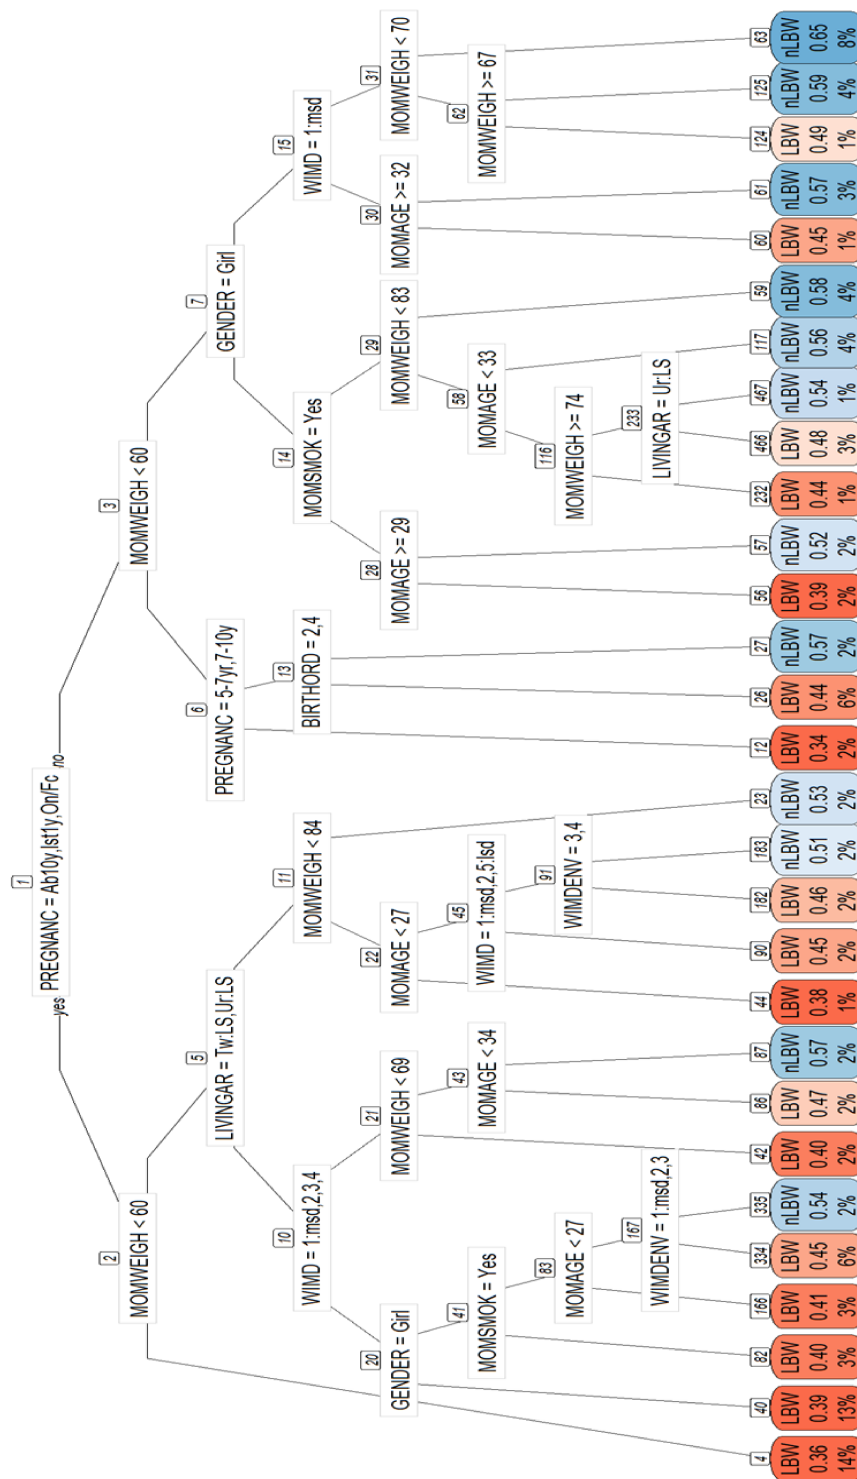

**Supplementary Figure 3: Decision tree for non-singleton children**
